# Supplementary material for: Whole-exome sequencing identified a novel mutation of AURKC in a Chinese family with macrozoospermia
Source: PubMed Central journal article supplement (PMC6439091; doi:10.1007/s10815-018-1374-3), 2018-12-29
Supplement: 10815_2018_1374_MOESM2_ESM.pdf [file 10815_2018_1374_MOESM2_ESM.pdf]

Supplementary Table 1. Homozygous sequence variants were found by whole-exome sequencing.

| Gene            | Change                | Annotation                                                 |
|-----------------|-----------------------|------------------------------------------------------------|
| <i>AMPD2</i>    | missense variant      | NM_004037.7:c.1300A>G (p.Ile434Val)                        |
| <i>CD58</i>     | missense variant      | NM_001779.2:c.278A>G (p.Tyr93Cys)                          |
| <i>SRGAP2C</i>  | missense variant      | NM_001271872.1:c.281A>G (p.His94Arg)                       |
| <i>VPS45</i>    | missense variant      | NM_007259.4:c.506T>G (p.Leu169Arg)                         |
| <i>FLG</i>      | missense variant      | NM_002016.1:c.3397C>T (p.Arg1133Trp)                       |
| <i>KCNN3</i>    | inframe insertion     | NM_001204087.1:c.230_241dupAGCAGCAGCAGC (p.Gln77_Gln80dup) |
| <i>USH2A</i>    | splice region variant | NM_206933.2:c.848+5G>C                                     |
| <i>ZNF678</i>   | missense variant      | NM_178549.3:c.853A>T (p.Ile285Phe)                         |
| <i>SNAP47</i>   | splice region variant | NM_053052.3:c.1249-6C>T                                    |
| <i>C1orf35</i>  | missense variant      | NM_024319.2:c.265A>C (p.Lys89Gln)                          |
| <i>IBA57</i>    | missense variant      | NM_001010867.2:c.947A>C (p.Asn316Thr)                      |
| <i>HIST3H3</i>  | missense variant      | NM_003493.2:c.190C>T (p.Arg64Cys)                          |
| <i>CCSAP</i>    | missense variant      | NM_145257.3:c.311A>G (p.Gln104Arg)                         |
| <i>TARBP1</i>   | missense variant      | NM_005646.3:c.2968A>C (p.Asn990His)                        |
| <i>AURKC</i>    | missense variant      | NM_001015878.1:c.269G>A (p.Arg90Gln)                       |
| <i>ARHGAP21</i> | missense variant      | NM_020824.3:c.5654C>T (p.Thr1885Met)                       |
| <i>PDSS1</i>    | missense variant      | NM_014317.3:c.407T>G (p.Phe136Cys)                         |
| <i>PCDH15</i>   | missense variant      | NM_001142763.1:c.3466G>A (p.Gly1156Arg)                    |
| <i>ASCL1</i>    | inframe insertion     | NM_004316.3:c.178_186dupCAGCAGCAG (p.Gln60_Gln62dup)       |
| <i>FBN3</i>     | missense variant      | NM_032447.3:c.5857C>T (p.Arg1953Cys)                       |
| <i>MYO1F</i>    | missense variant      | NM_012335.3:c.2123T>A (p.Val708Glu)                        |
| <i>MUC16</i>    | missense variant      | NM_024690.2:c.29510C>T (p.Thr9837Ile)                      |
| <i>MRI1</i>     | missense variant      | NM_001031727.2:c.830A>G (p.Tyr277Cys)                      |
| <i>GGN</i>      | missense variant      | NM_152657.3:c.148T>C (p.Trp50Arg)                          |
| <i>DYRK1B</i>   | missense variant      | NM_004714.1:c.1031G>A (p.Arg344His)                        |
| <i>C19orf54</i> | missense variant      | XM_005258778.1:c.16C>G (p.Leu6Val)                         |
| <i>CD79A</i>    | missense variant      | NM_001783.3:c.301G>A (p.Gly101Arg)                         |
| <i>CEACAM16</i> | splice region variant | NM_001039213.2:c.37+7G>A                                   |
| <i>ZNF577</i>   | stop gained           | NM_032679.2:c.193C>T (p.Arg65Ter)                          |
| <i>CACNG6</i>   | missense variant      | NM_145814.1:c.365C>T (p.Thr122Met)                         |
| <i>ZSCAN18</i>  | missense variant      | NM_001145542.1:c.1637C>T (p.Ala546Val)                     |
| <i>PJA2</i>     | missense variant      | NM_014819.4:c.631G>A (p.Ala211Thr)                         |
| <i>SLC22A23</i> | splice region variant | NM_015482.1:c.1578A>G (NM_015482.1:c.1578A>G(p.%3D))       |
| <i>IP6K3</i>    | missense variant      | NM_054111.4:c.514A>G (p.Asn172Asp)                         |
| <i>ZNF318</i>   | missense variant      | NM_014345.2:c.1970G>C (p.Cys657Ser)                        |
| <i>GCM1</i>     | missense variant      | NM_003643.3:c.34G>A (p.Glu12Lys)                           |
