# Supplementary material for: Whole-exome sequencing identified a novel mutation of AURKC in a Chinese family with macrozoospermia
Source: Springer Nature journal article supplement (doi:10.1007/s10815-018-1374-3), 2018-12-29

# Supplementary Figure 1

A

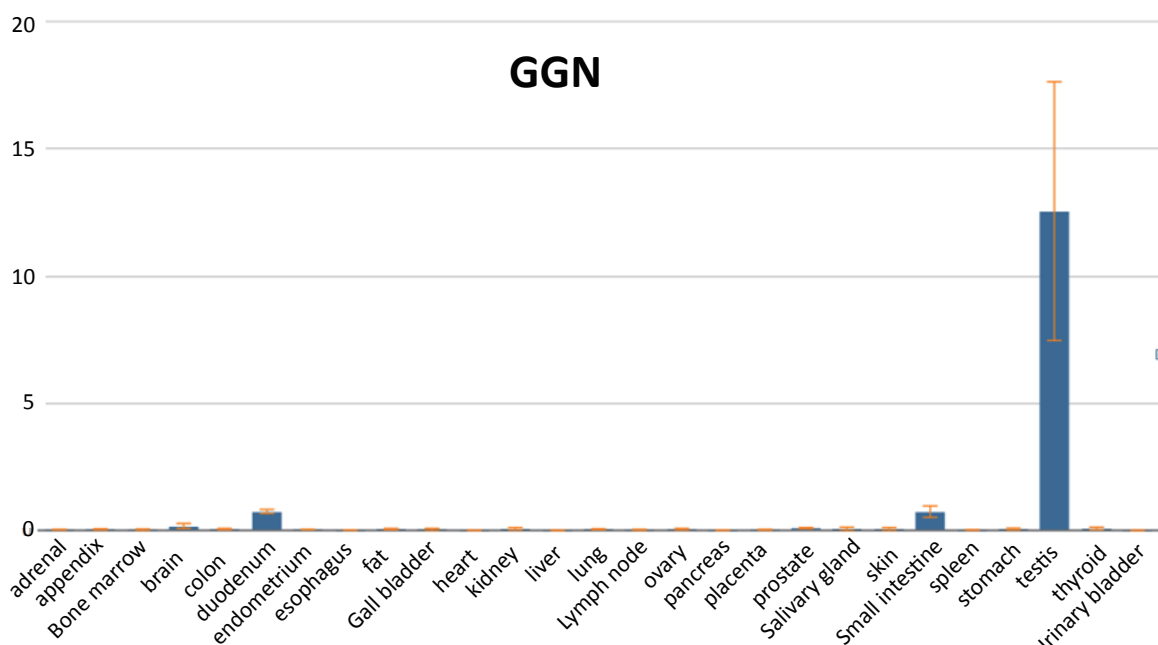

B

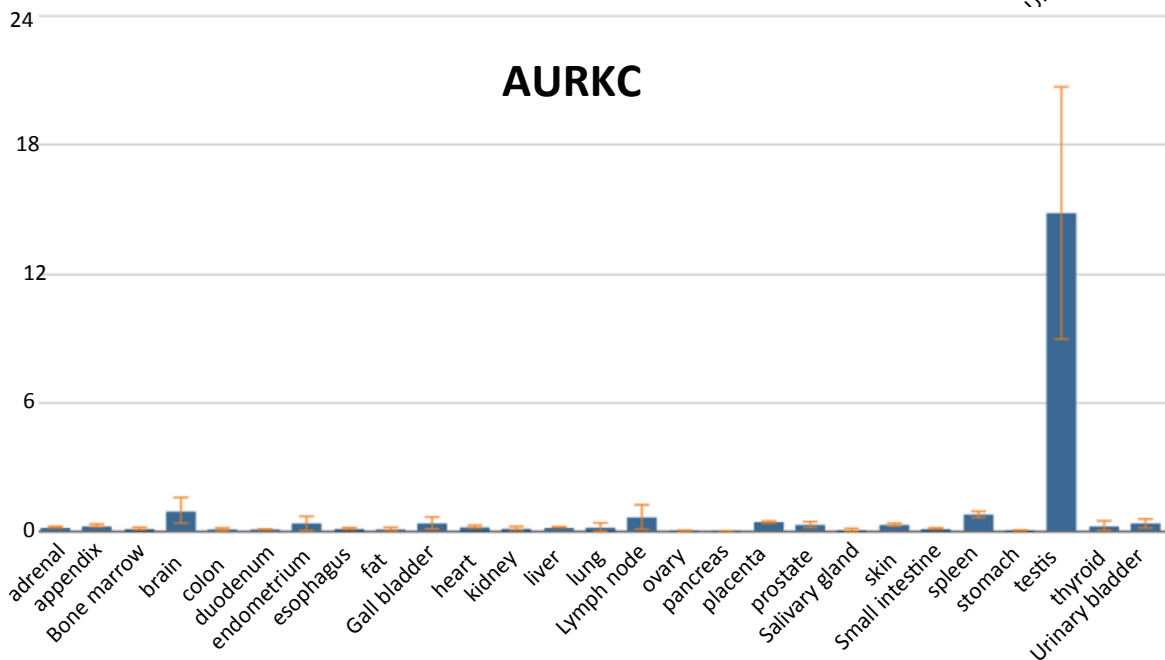

Supplement: MOESM1 [file 16362644]
