# Supplementary material for: Whole-exome sequencing identified a novel mutation of AURKC in a Chinese family with macrozoospermia
Source: Springer Nature journal article supplement (doi:10.1007/s10815-018-1374-3), 2018-12-29
Supplement: MOESM3 [file 16362644]

Table 2 In silico analysis of the 269 G>A mutation in AKRUC

| Mutation | Amino acid change | Polyphen-2 <sup>a</sup>      | SIFT <sup>b</sup>                 | Mutation taster <sup>c</sup> | ExAC | 1000G | gnomAD |
|----------|-------------------|------------------------------|-----------------------------------|------------------------------|------|-------|--------|
| c.G269A  | p.R90Q            | possible damaging<br>(0.651) | affect protein function<br>(0.00) | disease causing<br>(0.9999)  | 0    | 0     | 0      |

a Polyphen-2 (<http://genetics.bwh.harvard.edu/pph2/>).

b SIFT (<http://gsift.jcvi.org>).

c Mutation taster (<http://www.mutationtaster.org/>)
